# Supplementary material for: Neoadjuvant Chemotherapy in early-stage breast cancer: the trend over time and the impact on axillary management, A National Cancer Database Analysis
Source: Research Square preprint supplement (doi:10.21203/rs.3.rs-6947236/v1), 2025-07-14
Supplement: Supplementary file 1 [file c248979e67b8193e95176a54.docx]

**Patinets exclusion inclusion criteria:**

- Inclusion:
- Breast cancer patients above 18 years old: 3,956,621
- Exclusion:
- Male: 33,337
- History of other cancers: 714,913
- Year of diagnosis before 2010: 913,400

N:2,294,971

**Tumor exclusion inclusion criteria:**

- Inclusion:
- Clinical node-negative: 458,769
- cT1 cT2: 166,422
- Stage 1,2: 3,396
- Exclusion:
  - Insitu breast cancer: 414,280
  - Clinical/Pathologic M1: 11,764
  - Clinical/Pathologic Stage III, IV: 342

N: 1,239,998

**Treatment exclusion criteria**

- No or unknown surgery of the primary site: 42,498
- No surgery of the regional LNs: 61,617
- Hormone therapy before surgery: 23,793
- Radiotherapy before surgery: 906
- No chemotherapy administered or unknown:733,506
- Unknown number of positive nodes: 3,475
- Unknown sequence of chemotherapy: 79,093

N: 295,110

Neoadjuvant chemotherapy 38,315 (12.98%) Adjuvant chemotherapy 256,795 (87.02%)
